# Supplementary material for: Healthcare Professionals’ Attitudes toward Rapid Whole Genome Sequencing in Pediatric Acute Care
Source: MDPI journal article supplement (doi:10.3390/children9030357), 2022-03-04
Supplement: s1 [file s1]

**Table S1.** Univariate regression models predicting the three factors and total rWGS attitudes score (N=307). Coefficient (95% CI) [p-value].

| Term                                                                               | Factor 1: Personal capability      | Factor 2: Potential/intention       | Factor 3: Implementation            | Total Attitudes Score           |
|------------------------------------------------------------------------------------|------------------------------------|-------------------------------------|-------------------------------------|---------------------------------|
| Years in role                                                                      | -0.00152 (-0.0102, 0.00712) [0.73] | -0.00392 (-0.0126, 0.00471) [0.37]  | -0.00336 (-0.0118, 0.0051) [0.43]   | -0.0359 (-0.133, 0.0615) [0.47] |
| Age                                                                                | 0.004 (-0.00458, 0.0126) [0.36]    | -0.00122 (-0.00982, 0.00738) [0.78] | 0.000958 (-0.00751, 0.00943) [0.82] | 0.0241 (-0.073, 0.121) [0.63]   |
| Male gender                                                                        | -0.497 (-0.781, -0.212) [<0.001]   | -0.253 (-0.536, 0.0289) [0.078]     | -0.488 (-0.762, -0.214) [<0.001]    | -5.78 (-8.96, -2.59) [<0.001]   |
| Racial/Ethnic Identity (ref = White)                                               | 0.216 (-0.123, 0.555) [0.21]       | -0.0196 (-0.351, 0.312) [0.91]      | 0.156 (-0.175, 0.486) [0.35]        | 1.74 (-2.06, 5.54) [0.37]       |
| Site2 (ref = Site 1)                                                               | 0.00407 (-0.241, 0.249) [0.97]     | 0.0718 (-0.172, 0.316) [0.56]       | 0.279 (0.0369, 0.522) [0.024]       | 1.41 (-1.37, 4.2) [0.32]        |
| Other sites (ref = Site 1)                                                         | 0.401 (0.117, 0.684) [<0.01]       | 0.327 (0.0416, 0.612) [0.025]       | 0.174 (-0.105, 0.453) [0.22]        | 4.04 (0.834, 7.25) [0.014]      |
| NICU/PICU (vs another unit)                                                        | -0.618 (-0.829, -0.408) [<0.001]   | -0.228 (-0.445, -0.0107) [0.04]     | -0.446 (-0.656, -0.235) [<0.001]    | -6.12 (-8.52, -3.73) [<0.001]   |
| Clinical role (vs non-clinical)                                                    | 0.799 (0.597, 1) [<0.001]          | 0.57 (0.361, 0.778) [<0.001]        | 0.65 (0.448, 0.852) [<0.001]        | 9.3 (7.04, 11.6) [<0.001]       |
| No genetics/genomics training                                                      | -0.799 (-1.04, -0.553) [<0.001]    | -0.677 (-0.924, -0.43) [<0.001]     | -0.653 (-0.896, -0.411) [<0.001]    | -9.68 (-12.4, -6.95) [<0.001]   |
| Self-rated level of knowledge about rWGS                                           | 0.581 (0.494, 0.669) [<0.001]      | 0.486 (0.392, 0.58) [<0.001]        | 0.46 (0.367, 0.554) [<0.001]        | 6.95 (5.99, 7.91) [<0.001]      |
| Concerns about potential long-term effects of genomic testing on patients/families | -0.0412 (-0.0845, 0.167) [0.52]    | -0.276 (0.157, 0.395) [<0.001]      | -0.0534 (-0.0748, 0.182) [0.41]     | -1.49 (0.0595, 2.92) [0.041]    |
| Confidence about future insurance coverage for rWGS                                | 0.344 (0.211, 0.476) [<0.001]      | 0.371 (0.242, 0.499) [<0.001]       | 0.295 (0.161, 0.43) [<0.001]        | 4.49 (2.99, 5.99) [<0.001]      |
| Concern rWGS will lead to insurance discrimination                                 | -0.14 (-0.27, -0.0104) [0.034]     | -0.078 (-0.206, 0.0502) [0.23]      | -0.0545 (-0.186, 0.0774) [0.42]     | -1.27 (-2.75, 0.216) [0.094]    |
| Concern about racial disparities in use of genomic testing                         | -0.106 (-0.0253, 0.237) [0.11]     | -0.37 (0.248, 0.491) [<0.001]       | -0.0978 (-0.0342, 0.23) [0.15]      | -2.37 (0.894, 3.84) [0.0017]    |

|                                                                                                         |                               |                                |                               |                            |
|---------------------------------------------------------------------------------------------------------|-------------------------------|--------------------------------|-------------------------------|----------------------------|
| Considers patient's race/ancestry in disease risk and treatment decisions                               | 0.00381 (-0.122, 0.13) [0.95] | 0.163 (0.0397, 0.286) [0.0097] | -0.0163 (-0.145, 0.112) [0.8] | 0.619 (-0.815, 2.05) [0.4] |
| Conversations with families about rWGS testing or diagnosed disorder (past 6 months)                    | 0.84 (0.607, 1.07) [<0.001]   | 0.619 (0.381, 0.857) [<0.001]  | 0.52 (0.282, 0.757) [<0.001]  | 9.05 (6.4, 11.7) [<0.001]  |
| Involved in the care of an inpatient child for whom rWGS was ordered (past 6 months)                    | 0.466 (0.25, 0.681) [<0.001]  | 0.697 (0.492, 0.902) [<0.001]  | 0.597 (0.392, 0.803) [<0.001] | 7.68 (5.33, 10) [<0.001]   |
| Cared for patients/families referred for genetic counseling as a result of rWGS testing (past 6 months) | 0.475 (0.259, 0.69) [<0.001]  | 0.659 (0.454, 0.864) [<0.001]  | 0.486 (0.276, 0.696) [<0.001] | 7.12 (4.75, 9.49) [<0.001] |

rWGS: rapid whole genome sequencing
